# Supplementary material
Source: Springer Nature journal article supplement (https://www.springermedizin.de/resource/supplementary/13098_2014_348_MOESM9_ESM.pdf/9671136)

**A Liver**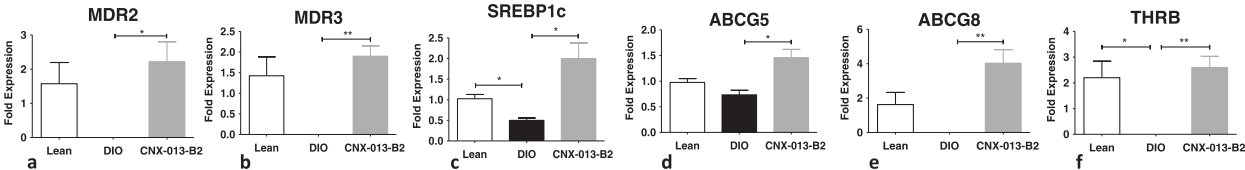**B Ileum**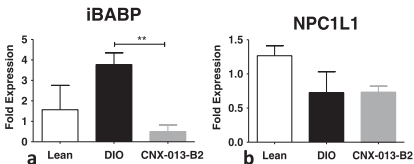**C Adipose (Inguinal)**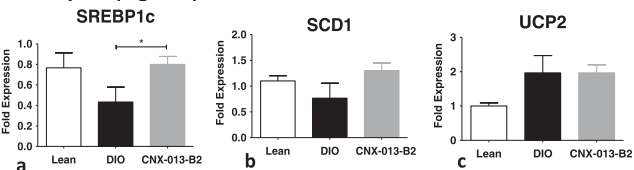**D Muscle**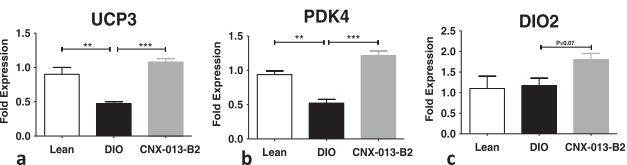

Supplement: MOESM9 [file 9671136]
